# Supplementary material
Source: MDPI journal article supplement (https://www.mdpi.com/2313-5786/2/1/1)

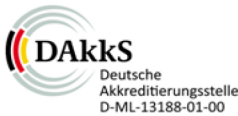

Extern Nr.
Naam: Voornaam, Geboortedatum, Geslacht, Opdrachtnr., Ingangsdatum
Datum monsterafname, Materiaal, Gevalideerd door, Gevalideerd op, Uitslagstatus, Uitslagstatus op

Table with 5 columns: Test, Uitslag, Eenheid, Normbereik, Vorig onderzoek

Mikrobiomanalyse Mini PLUS (Microbioom Center)

Molekulargenetische Mikrobiomanalyse 2.0

Kenmerken van de feces

Table with 5 columns: Kenmerk, Uitslag, Eenheid, Normbereik, Vorig onderzoek. Rows: Kleur (bruin), Consistentie (taai), pH-waarde (7,3).

Diversiteit

Table with 5 columns: Diversiteit, Uitslag, Eenheid, Normbereik, Vorig onderzoek. Row: Diversiteit (5,61).

De diversiteit aan bacteriën in de darm kan van mens tot mens sterk variëren. Frequent gebruik van antibiotica, infecties toenemende leeftijd, eenzijdige voeding of roken zijn hierop van invloed.

Grad

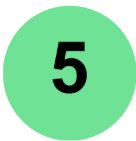

Indeling van bacteriën naar fyllum

Table with 5 columns: Bacteriële groep, Uitslag, Eenheid, Normbereik, Vorig onderzoek. Rows: Actinobacteria, Bacteroidetes, Firmicutes, Fusobacteria, Proteobacteria, Verrucomicrobia, Overige.

Ratio

Table with 5 columns: Ratio, Uitslag, Eenheid, Normbereik, Vorig onderzoek. Row: Firmicutes/Bacteroidetes (0,81).

Enterotype

Table with 5 columns: Enterotype, Uitslag, Eenheid, Normbereik, Vorig onderzoek. Row: Bacteroides.

Het menselijke microbiom kan in drie enterotypes ingedeeld worden. De darmbacteriën vormen, afhankelijk van het enterotype, stabiele, maar duidelijk verschillende clusters met typische metabolische eigenschappen.

Enterotyp

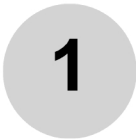

Dysbiose-Index

De dysbiose index is een maatstaf die afwijkingen binnen het microbiom weergeeft. Bij deze maatstaf wordt rekening gehouden met alle onderzochte bacteriefyla, -geslachten en -soorten e.e.a. afhankelijk van hun relevantie.

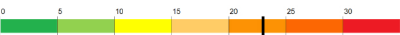

Index

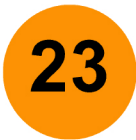

| Naam                                                                                   | Geboortedatum           |             | Opdrachtnr.                       |                                        |
|----------------------------------------------------------------------------------------|-------------------------|-------------|-----------------------------------|----------------------------------------|
| Voornaam                                                                               | Geslacht                |             | Ingangsdatum                      |                                        |
| Test                                                                                   | Uitslag                 | Eenheid     | Normbereik                        | Vorig onderzoek                        |
| Indeling van bacteriën naar fyllum met de belangrijkste bacteriegeslachten en -soorten |                         |             |                                   |                                        |
| Actinobacteria                                                                         |                         |             |                                   |                                        |
| Bifidobacterium                                                                        | 1,2 x 10 <sup>10</sup>  | KVE/g feces | > 5,0 x 10 <sup>9</sup>           | <div><div></div></div> FE<br>NA) MGSEQ |
| Bifidobacterium                                                                        | adolescentis            | 77          | %                                 | FE                                     |
| Bifidobacterium                                                                        | longum                  | 22          | %                                 | NA) MGSEQ                              |
| Equol vormende bacteriën                                                               | 6,0 x 10 <sup>9</sup>   | KVE/g feces | > 5,0 x 10 <sup>9</sup>           | <div><div></div></div> FE<br>NA) MGSEQ |
| Bacteroidetes                                                                          |                         |             |                                   |                                        |
| Bacteroides                                                                            | 2,6 x 10 <sup>11</sup>  | KVE/g feces | > 1,5 x 10 <sup>11</sup>          | <div><div></div></div> FE<br>NA) MGSEQ |
| Prevotella                                                                             | 1,2 x 10 <sup>9</sup>   | KVE/g feces | > 1,0 x 10 <sup>10</sup>          | <div><div></div></div> FE<br>NA) MGSEQ |
| Firmicutes                                                                             |                         |             |                                   |                                        |
| Butyraatproducerende bacteriën                                                         |                         |             |                                   |                                        |
| Faecalibacterium prausnitzii                                                           | 8,4 x 10 <sup>10</sup>  | KVE/g feces | > 5,0 x 10 <sup>10</sup>          | <div><div></div></div> FE<br>NA) MGSEQ |
| Eubacterium rectale                                                                    | 1,2 x 10 <sup>10</sup>  | KVE/g feces | > 1,0 x 10 <sup>10</sup>          | <div><div></div></div> FE<br>NA) MGSEQ |
| Eubacterium hallii                                                                     | 3,5 x 10 <sup>9</sup>   | KVE/g feces | > 5,0 x 10 <sup>9</sup>           | <div><div></div></div> FE<br>NA) MGSEQ |
| Roseburia spp.                                                                         | 5,5 x 10 <sup>10</sup>  | KVE/g feces | > 2,0 x 10 <sup>10</sup>          | <div><div></div></div> FE<br>NA) MGSEQ |
| Ruminococcus spp.                                                                      | 1,6 x 10 <sup>10</sup>  | KVE/g feces | > 3,0 x 10 <sup>10</sup>          | <div><div></div></div> FE<br>NA) MGSEQ |
| Coprococcus                                                                            | 7,3 x 10 <sup>9</sup>   | KVE/g feces | > 2,0 x 10 <sup>10</sup>          | <div><div></div></div> FE<br>NA) MGSEQ |
| Totaalkiemgetal                                                                        | 1,9 x 10 <sup>11</sup>  | KVE/g feces | > 1,3 x 10 <sup>11</sup>          | <div><div></div></div> FE<br>NA) MGSEQ |
| Clostridia                                                                             |                         |             |                                   |                                        |
| Clostridium totaalkiemgetal                                                            | 7,0 x 10 <sup>9</sup>   | KVE/g feces | < 4,0 x 10 <sup>9</sup>           | <div><div></div></div> FE<br>NA) MGSEQ |
| Clostridien Cluster I                                                                  | 7,2 x 10 <sup>8</sup>   | KVE/g feces | < 2,0 x 10 <sup>9</sup>           | <div><div></div></div> FE<br>NA) MGSEQ |
| Fusobacteria                                                                           |                         |             |                                   |                                        |
| Fusobacterium spp.                                                                     | < 1,0 x 10 <sup>6</sup> | KVE/g feces | < 1,0 x 10 <sup>7</sup>           | <div><div></div></div> FE<br>NA) MGSEQ |
| Verrucomicrobia                                                                        |                         |             |                                   |                                        |
| Akkermansia muciniphila                                                                | 2,8 x 10 <sup>8</sup>   | KVE/g feces | > 5,0 x 10 <sup>9</sup>           | <div><div></div></div> FE<br>NA) MGSEQ |
| Proteobacteria                                                                         |                         |             |                                   |                                        |
| Pathogene of potentieel pathogene bacteriën                                            |                         |             |                                   |                                        |
| Haemophilus                                                                            | 1,7 x 10 <sup>8</sup>   | KVE/g feces | < 1,0 x 10 <sup>9</sup>           | <div><div></div></div> FE<br>NA) MGSEQ |
| Acinetobacter                                                                          | < 1,0 x 10 <sup>6</sup> | KVE/g feces | < 1,0 x 10 <sup>6</sup>           | <div><div></div></div> FE<br>NA) MGSEQ |
| Escherichia coli Biovare                                                               | < 1,0 x 10 <sup>4</sup> | KVE/g feces | < 1,0 x 10 <sup>4</sup>           | <div><div></div></div> FE<br>A) KULTAZ |
| Proteus species                                                                        | < 1,0 x 10 <sup>4</sup> | KVE/g feces | < 1,0 x 10 <sup>4</sup>           | <div><div></div></div> FE<br>A) KULTAZ |
| Klebsiella soorten                                                                     | < 1,0 x 10 <sup>4</sup> | KVE/g feces | < 1,0 x 10 <sup>4</sup>           | <div><div></div></div> FE<br>A) KULTAZ |
| Enterobacter soorten                                                                   | 6,0 x 10 <sup>6</sup>   | KVE/g feces | < 1,0 x 10 <sup>4</sup>           | <div><div></div></div> FE<br>A) KULTAZ |
| Serratia species                                                                       | < 1,0 x 10 <sup>4</sup> | KVE/g feces | < 1,0 x 10 <sup>4</sup>           | <div><div></div></div> FE<br>A) KULTAZ |
| Hafnia soorten                                                                         | < 1,0 x 10 <sup>4</sup> | KVE/g feces | < 1,0 x 10 <sup>4</sup>           | <div><div></div></div> FE<br>A) KULTAZ |
| Morganella spp.                                                                        | < 1,0 x 10 <sup>4</sup> | KVE/g feces | < 1,0 x 10 <sup>4</sup>           | <div><div></div></div> FE<br>NA) MIB   |
| Histamine vormende bacteriën                                                           |                         |             |                                   |                                        |
| Histamine vormende bacteriën                                                           | < 1,0 x 10 <sup>6</sup> | KVE/g feces | < 5,0 x 10 <sup>8</sup>           | <div><div></div></div> FE<br>NA) MGSEQ |
| H2S-vorming                                                                            |                         |             |                                   |                                        |
| Sulfaat reducerende bacteriën                                                          | 5,3 x 10 <sup>9</sup>   | KVE/g feces | < 2,0 x 10 <sup>9</sup>           | <div><div></div></div> FE<br>NA) MGSEQ |
| Immunogeniciteit/Mucine vorming                                                        |                         |             |                                   |                                        |
| Immunogeen werkende bacteriën                                                          |                         |             |                                   |                                        |
| Escherichia coli                                                                       | 2,0 x 10 <sup>8</sup>   | KVE/g feces | 10 <sup>6</sup> - 10 <sup>7</sup> | <div><div></div></div> FE<br>A) KULTAZ |
| Enterococcus soorten                                                                   | < 1,0 x 10 <sup>4</sup> | KVE/g feces | 10 <sup>6</sup> - 10 <sup>7</sup> | <div><div></div></div> FE<br>A) KULTAZ |
| Lactobacillus soorten                                                                  | < 1,0 x 10 <sup>4</sup> | KVE/g feces | 10 <sup>5</sup> - 10 <sup>7</sup> | <div><div></div></div> FE<br>A) KULTAZ |
| Mucine vorming/slijmvliesbarrière                                                      |                         |             |                                   |                                        |

| Naam                                        | Geboortedatum |             | Opdrachtnr.   |                 |
|---------------------------------------------|---------------|-------------|---------------|-----------------|
| Voornaam                                    | Geslacht      |             | Ingangsdatum  |                 |
|                                             |               | mannelijk   | 18.06.2020    |                 |
| Test                                        | Uitslag       | Eenheid     | Normbereik    | Vorig onderzoek |
| Akkermansia muciniphila                     | 2,8 x 10^8    | KVE/g feces | > 5,0 x 10^9  | FE<br>NA) MGSEQ |
| Faecalibacterium prausnitzii                | 8,4 x 10^10   | KVE/g feces | > 5,0 x 10^10 | FE<br>NA) MGSEQ |
| Gisten/schimmels                            |               |             |               |                 |
| Candida albicans                            | < 1,0 x 10^3  | KVE/g feces | < 1,0 x 10^3  | FE<br>A) KULTAZ |
| Candida soorten                             | < 1,0 x 10^3  | KVE/g feces | < 1,0 x 10^3  | FE<br>A) KULTAZ |
| Geotrichum candidum                         | < 1,0 x 10^3  | KVE/g feces | < 1,0 x 10^3  | FE<br>A) KULTAZ |
| Schimmels                                   | negatief      |             | negatief      | FE<br>A) KULTAZ |
| Vertering                                   |               |             |               |                 |
| Vetgehalte                                  | 5,10          | g/100g      | < 3,5         | FE<br>NA) PHOT  |
| Stikstofgehalte                             | 0,90          | g/100g      | < 1,0         | FE<br>NA) PHOT  |
| Suikergehalte                               | 3,80          | g/100g      | < 2,5         | FE<br>NA) PHOT  |
| Watergehalte                                | 72,20         | g/100g      | 75 - 85       | FE<br>NA) PHOT  |
| Extra parameter(s)                          |               |             |               |                 |
| Calprotectine                               | <17,900       | mg/l        | < 50          | FE<br>A) ELISA  |
| Alpha-1-antitripsine                        | 60,6          | mg/dl       | < 27,5        | FE<br>A) ELISA  |
| Secretoir Immunoglobuline A                 | 1067,8        | µg/ml       | 510 - 2040    | FE<br>A) ELISA  |
| Zonuline                                    | 53,59         | ng/ml       | < 55          | FE<br>A) ELISA  |
| Speciale gastro-enterologische diagnostiek  |               |             |               |                 |
| Gluten-sensitieve enteropathie / coeliakie  |               |             |               |                 |
| Anti-gliadine antilichamen in feces         | <25,00        | U/l         | < 100         | FE<br>A) ELISA  |
| Anti-transglutaminase antilichamen in feces | <50,00        | U/l         | < 100         | FE<br>A) ELISA  |

## Uitslagen en therapiemogelijkheden

Dysbiose-index 23

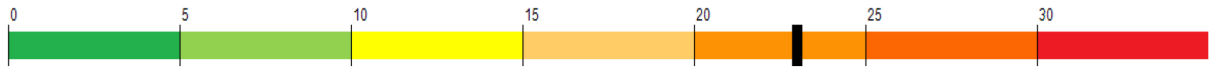

pH-waarde

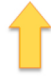

milieustabiliserende probiotica \*

Enterotype

1

controleer inname vitamine A, E, ijzer en calcium

Diversiteit

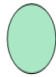

Firmicutes/Bacteroidetes-ratio

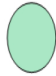

Equol-bildende Bakterien

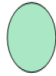

Butyraatproducerende bacteriën

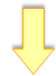

prebiotica op basis van resistent zetmeel\* of scFOS/scGOS\*

Mucusvorming (A. muciniphila)

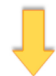

prebiotica (scFOS/scGOS)\*

Slijmvliesintegriteit (F. prausnitzii)

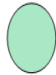

Milieustabiliserende bacteriën

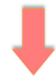

milieustabiliserende probiotica\*, prebiotica (scFOS/scGOS)\*

Immunogeen werkende bacteriën

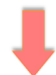

immunogeen werkende probiotica\*

Clostridia totaalkiemgetal

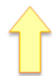

milieustabiliserende probiotica\*, prebiotica (scFOS/scGOS)\*

Clostridia Cluster I

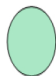

Fusobacteriën

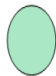

Histamine vormende bacteriën

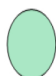

H2S vormende bacteriën

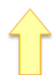

vet- en eiwitreductie, milieustabiliserende probiotica, prebiotica op basis van resistent zetmeel of scFOS/scGOS

Potentieel pathogene bacteriën

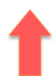

immunogeen werkende /toxine remmende probiotica\*

Candida (facultatief pathogeen)

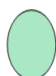

Supplement: s1 [file s1]
