# Supplementary material
Source: MDPI journal article supplement (https://www.mdpi.com/2313-5786/2/1/1)
Supplement: s1 [file s1]

## External ID

|                 |                 |                 |
|-----------------|-----------------|-----------------|
| Name            | Date of Birth   | Order ID        |
| First Name      | Sex             | Order Date      |
| Sampling Date   | Validation Date | Findings Status |
| Sample Material | Validation on   | Findings Date   |

| Test                                                               | Result                               | Unit   | Standard Range                     | Previous Result         | Method           |
|--------------------------------------------------------------------|--------------------------------------|--------|------------------------------------|-------------------------|------------------|
| <b>Stool Diagnostics</b>                                           |                                      |        |                                    |                         |                  |
| <b>Maldigestion, malabsorption, MIS</b>                            |                                      |        |                                    |                         |                  |
| <b>Digestive Residues</b>                                          |                                      |        |                                    |                         |                  |
| Quantitative determination of fat                                  | 3,40                                 | g/100g | < 3,5                              | 5,10                    | FE<br>NA) PHOT   |
| Quantitative determination of nitrogen                             | 0,60                                 | g/100g | < 1,0                              | 0,90                    | FE<br>NA) PHOT   |
| Quantitative determination of sugar                                | 3,20                                 | g/100g | < 2,5                              | 3,80                    | FE<br>NA) PHOT   |
| Quantitative determination of water                                | 77,40                                | g/100g | 75 - 85                            | 72,20                   | FE<br>NA) PHOT   |
| <b>Determination of Maldigestion</b>                               |                                      |        |                                    |                         |                  |
| Pancreatic elastase                                                | 379,36                               | µg/g   | > 200                              |                         | FE<br>A) ELISA   |
| Bile acids in stool                                                | 61,40                                | µmol/l | < 70                               |                         | FE<br>NA) PHOTO  |
| <b>Detection of Malabsorption</b>                                  |                                      |        |                                    |                         |                  |
| Calprotectin                                                       | 18,40                                | mg/l   | < 50                               | <17,900                 | FE<br>A) ELISA   |
| Alpha1-Antitrypsin                                                 | 58,2                                 | mg/dl  | < 27,5                             | 60,6                    | FE<br>A) ELISA   |
| <b>Special Request</b>                                             |                                      |        |                                    |                         |                  |
| Secretory IgA                                                      | 574,6                                | µg/ml  | 510 - 2040                         | 1067,8                  | FE<br>A) ELISA   |
| <b>Quantitative Bacteriological and Mycological Stool Analysis</b> |                                      |        |                                    |                         |                  |
| <b>Determination of Aerobic Bacteria</b>                           |                                      |        |                                    |                         |                  |
| Escherichia coli                                                   | < 1,0 x 10 <sup>4</sup> CFU/g faeces |        | 10 <sup>6</sup> - 10 <sup>7</sup>  | 2,0 x 10 <sup>8</sup>   | FE<br>NA) KULTAZ |
| Escherichia coli Biovare                                           | < 1,0 x 10 <sup>4</sup> CFU/g faeces |        | < 1,0 x 10 <sup>4</sup>            | < 1,0 x 10 <sup>4</sup> | FE<br>NA) KULTAZ |
| Proteus species                                                    | < 1,0 x 10 <sup>4</sup> CFU/g faeces |        | < 1,0 x 10 <sup>4</sup>            | < 1,0 x 10 <sup>4</sup> | FE<br>NA) KULTAZ |
| Klebsiella species                                                 | < 1,0 x 10 <sup>4</sup> CFU/g faeces |        | < 1,0 x 10 <sup>4</sup>            | < 1,0 x 10 <sup>4</sup> | FE<br>NA) KULTAZ |
| Pseudomonas species                                                | < 1,0 x 10 <sup>4</sup> CFU/g faeces |        | < 1,0 x 10 <sup>4</sup>            |                         | FE<br>NA) KULTAZ |
| Enterobacter species                                               | < 1,0 x 10 <sup>4</sup> CFU/g faeces |        | < 1,0 x 10 <sup>4</sup>            | 6,0 x 10 <sup>6</sup>   | FE<br>NA) KULTAZ |
| Serratia species                                                   | < 1,0 x 10 <sup>4</sup> CFU/g faeces |        | < 1,0 x 10 <sup>4</sup>            | < 1,0 x 10 <sup>4</sup> | FE<br>NA) KULTAZ |
| Hafnia species                                                     | < 1,0 x 10 <sup>4</sup> CFU/g faeces |        | < 1,0 x 10 <sup>4</sup>            | < 1,0 x 10 <sup>4</sup> | FE<br>NA) KULTAZ |
| Enterococcus species                                               | 2,0 x 10 <sup>7</sup> CFU/g faeces   |        | 10 <sup>6</sup> - 10 <sup>7</sup>  | < 1,0 x 10 <sup>4</sup> | FE<br>NA) KULTAZ |
| <b>Determination of Anaerobic Bacteria</b>                         |                                      |        |                                    |                         |                  |
| Bifido bacteria species                                            | < 1,0 x 10 <sup>7</sup> CFU/g faeces |        | 10 <sup>9</sup> - 10 <sup>11</sup> |                         | FE<br>NA) KULTAZ |
| Bacterioides species                                               | 3,0 x 10 <sup>9</sup> CFU/g faeces   |        | 10 <sup>9</sup> - 10 <sup>11</sup> |                         | FE<br>NA) KULTAZ |
| Lactobacillus species                                              | 1,0 x 10 <sup>5</sup> CFU/g faeces   |        | 10 <sup>5</sup> - 10 <sup>7</sup>  | < 1,0 x 10 <sup>4</sup> | FE<br>NA) KULTAZ |
| Clostridium species                                                | < 1,0 x 10 <sup>5</sup> CFU/g faeces |        | < 1,0 x 10 <sup>5</sup>            |                         | FE<br>NA) KULTAZ |
| <b>Mycological Stool Examination</b>                               |                                      |        |                                    |                         |                  |
| Candida species                                                    | < 1,0 x 10 <sup>3</sup> CFU/g faeces |        | < 1,0 x 10 <sup>3</sup>            | < 1,0 x 10 <sup>3</sup> | FE<br>NA) KULTAZ |
| Candida albicans                                                   | < 1,0 x 10 <sup>3</sup> CFU/g faeces |        | < 1,0 x 10 <sup>3</sup>            | < 1,0 x 10 <sup>3</sup> | FE<br>NA) KULTAZ |
| Moulds                                                             | negative                             |        | negative                           | negativ                 | FE<br>NA) KULTAZ |

| Name                | Date of Birth |              | Order ID       |                 |
|---------------------|---------------|--------------|----------------|-----------------|
| First Name          | Sex           |              | Order Date     |                 |
| Test                | Result        | Unit         | Standard Range | Previous Result |
| Geotrichum candidum | < 1,0 x 10^3  | CFU/g faeces | < 1,0 x 10^3   | < 1,0 x 10^3    |
| Stool Properties    |               |              |                |                 |
| Colour              | brown         |              |                | braun           |
| Consistency         | mushy         |              |                | zähbreiig       |
| pH                  | 6,7           |              | 5,8 - 6,5      | 7,3             |
