# Supplementary material
Source: MDPI journal article supplement (https://www.mdpi.com/2313-5786/2/1/1)
Supplement: s1 [file s1]

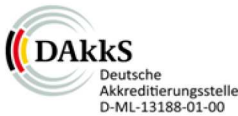

External ID

Table with 4 columns: Name, Date of Birth, Order ID, and Findings Status. Sub-headers include First Name, Sex, Order Date, Sampling Date, Validation Date, Findings Status, Sample Material, Validation on, Findings Date, and Final Report.

Table with 5 columns: Test, Result, Unit, Standard Range, and Previous Result.

Mikrobiomanalyse Midi PLUS (Microbioom Center)

Moleculargenetic Microbiomeanalysis MIDI

Stool Properties

Table with 5 columns: Test, Result, Unit, Standard Range, and Previous Result. Rows include Colour (dark brown), Consistency (tough pasty), and pH (7.2).

Biodiversity

Table with 5 columns: Test, Result, Unit, Standard Range, and Previous Result. Row includes Diversity (5.46).

The bacterial diversity in the intestinal tract may vary considerably from person to person. Antibiotic therapies, infections, increasing age, unbalanced diets or smoking are causes of declining diversity.

Grad

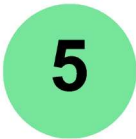

Bacteria Phyla (Distribution)

Table with 5 columns: Test, Result, Unit, Standard Range, and Previous Result. Rows include Actinobacteria, Bacteroidetes, Firmicutes, Fusobacteria, Proteobacteria, Verrucomicrobia, and Other.

Ratio

Table with 5 columns: Test, Result, Unit, Standard Range, and Previous Result. Row includes Firmicutes/Bacteroidetes (0.78).

Enterotype

Table with 5 columns: Test, Result, Unit, Standard Range, and Previous Result. Row includes Prevotella.

Human intestinal microbiomes can be differentiated into three Enterotypes. Enterotypes are defined by dominant bacterial clusters with distinct metabolic properties.

Enterotyp

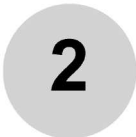

Dysbiosis index

The dysbiosis index represents a measure of deviations within the microbiome. Depending on their relevance, all detected phyla, genera and species are considered.

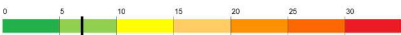

Index

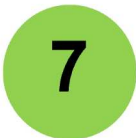

| Test                                               | Result                    | Unit | Standard Range | Previous Result        | Method           |
|----------------------------------------------------|---------------------------|------|----------------|------------------------|------------------|
| Bacteria Phyla - most important genera and species |                           |      |                |                        |                  |
| Actinobacteria                                     |                           |      |                |                        |                  |
| Bifidobacteria                                     | 6,5 x 10^9 CFU/g faeces   |      | > 5,0 x 10^9   | <div><div></div></div> | FE<br>NA) MGSEQ  |
| Bifidobacterium longum                             | 82                        | %    |                |                        | FE<br>NA) MGSEQ  |
| Bifidobacterium adolescentis                       | 18                        | %    |                |                        | FE<br>NA) MGSEQ  |
| Equol producing bacteria                           | 6,4 x 10^9 CFU/g faeces   |      | > 5,0 x 10^9   | <div><div></div></div> | FE<br>NA) MGSEQ  |
| Bacteroidetes                                      |                           |      |                |                        |                  |
| Bacteroides                                        | 1,2 x 10^11 CFU/g faeces  |      | > 1,5 x 10^11  | <div><div></div></div> | FE<br>NA) MGSEQ  |
| Prevotella                                         | 2,5 x 10^11 CFU/g faeces  |      | > 1,0 x 10^10  | <div><div></div></div> | FE<br>NA) MGSEQ  |
| Prevotella copri                                   | 25                        | %    |                |                        | FE<br>NA) MGSEQ  |
| Firmicutes                                         |                           |      |                |                        |                  |
| Butyrate producing bacteria                        |                           |      |                |                        |                  |
| Faecalibacterium prausnitzii                       | 9,8 x 10^10 CFU/g faeces  |      | > 5,0 x 10^10  | <div><div></div></div> | FE<br>NA) MGSEQ  |
| Eubacterium rectale                                | 3,1 x 10^9 CFU/g faeces   |      | > 1,0 x 10^10  | <div><div></div></div> | FE<br>NA) MGSEQ  |
| Eubacterium hallii                                 | 3,6 x 10^9 CFU/g faeces   |      | > 5,0 x 10^9   | <div><div></div></div> | FE<br>NA) MGSEQ  |
| Roseburia species                                  | 1,1 x 10^10 CFU/g faeces  |      | > 2,0 x 10^10  | <div><div></div></div> | FE<br>NA) MGSEQ  |
| Ruminococcus species                               | 3,2 x 10^10 CFU/g faeces  |      | > 3,0 x 10^10  | <div><div></div></div> | FE<br>NA) MGSEQ  |
| Coprococcus                                        | 2,9 x 10^10 CFU/g faeces  |      | > 2,0 x 10^10  | <div><div></div></div> | FE<br>NA) MGSEQ  |
| Total bacterial count                              | 1,7 x 10^11 CFU/g faeces  |      | > 1,3 x 10^11  | <div><div></div></div> | FE<br>NA) MGSEQ  |
| Clostridia                                         |                           |      |                |                        |                  |
| Clostridia total bacterial count                   | 2,5 x 10^9 CFU/g faeces   |      | < 4,0 x 10^9   | <div><div></div></div> | FE<br>NA) MGSEQ  |
| Clostridia cluster I                               | 9,5 x 10^8 CFU/g faeces   |      | < 2,0 x 10^9   | <div><div></div></div> | FE<br>NA) MGSEQ  |
| Fusobacteria                                       |                           |      |                |                        |                  |
| Fusobacterium species                              | < 1,0 x 10^6 CFU/g faeces |      | < 1,0 x 10^7   | <div><div></div></div> | FE<br>NA) MGSEQ  |
| Verrucomicrobia                                    |                           |      |                |                        |                  |
| Akkermansia muciniphila                            | 1,7 x 10^10 CFU/g faeces  |      | > 5,0 x 10^9   | <div><div></div></div> | FE<br>NA) MGSEQ  |
| Proteobacteria                                     |                           |      |                |                        |                  |
| Pathogenic or potentially pathogenic bacteria      |                           |      |                |                        |                  |
| Haemophilus                                        | 1,3 x 10^8 CFU/g faeces   |      | < 1,0 x 10^9   | <div><div></div></div> | FE<br>NA) MGSEQ  |
| Acinetobacter                                      | < 1,0 x 10^6 CFU/g faeces |      | < 1,0 x 10^6   | <div><div></div></div> | FE<br>NA) MGSEQ  |
| Escherichia coli BioVare                           | < 1,0 x 10^4 CFU/g faeces |      | < 1,0 x 10^4   | <div><div></div></div> | FE<br>NA) KULTAZ |
| Proteus species                                    | < 1,0 x 10^4 CFU/g faeces |      | < 1,0 x 10^4   | <div><div></div></div> | FE<br>NA) KULTAZ |
| Klebsiella species                                 | < 1,0 x 10^4 CFU/g faeces |      | < 1,0 x 10^4   | <div><div></div></div> | FE<br>NA) KULTAZ |
| Enterobacter species                               | < 1,0 x 10^4 CFU/g faeces |      | < 1,0 x 10^4   | <div><div></div></div> | FE<br>NA) KULTAZ |
| Serratia species                                   | < 1,0 x 10^4 CFU/g faeces |      | < 1,0 x 10^4   | <div><div></div></div> | FE<br>NA) KULTAZ |
| Hafnia species                                     | < 1,0 x 10^4 CFU/g faeces |      | < 1,0 x 10^4   | <div><div></div></div> | FE<br>NA) KULTAZ |
| Morganella species                                 | < 1,0 x 10^4 CFU/g faeces |      | < 1,0 x 10^4   | <div><div></div></div> | FE<br>NA) MIB    |
| Histamine producing bacteria                       |                           |      |                |                        |                  |
| Histamine producing bacteria                       | < 1,0 x 10^6 CFU/g faeces |      | < 5,0 x 10^8   | <div><div></div></div> | FE<br>NA) MGSEQ  |
| H2S production                                     |                           |      |                |                        |                  |
| Sulphate reducing bacteria                         | 2,2 x 10^9 CFU/g faeces   |      | < 2,0 x 10^9   | <div><div></div></div> | FE<br>NA) MGSEQ  |
| Immunogenicity / Mucus production                  |                           |      |                |                        |                  |
| Immunogenically effective bacteria                 |                           |      |                |                        |                  |
| Escherichia coli                                   | 2,0 x 10^7 CFU/g faeces   |      | 10^6 - 10^7    | <div><div></div></div> | FE<br>NA) KULTAZ |
| Enterococcus species                               | 1,0 x 10^6 CFU/g faeces   |      | 10^6 - 10^7    | <div><div></div></div> | FE<br>NA) KULTAZ |

| Test                                          | Result                    | Unit   | Standard Range | Previous Result        |                  |
|-----------------------------------------------|---------------------------|--------|----------------|------------------------|------------------|
| Lactobacillus species                         | 1,0 x 10^5 CFU/g faeces   |        | 10^5 - 10^7    | <div><div></div></div> | FE<br>NA) KULTAZ |
| Mucin production / Mucosa barrier             |                           |        |                |                        |                  |
| Akkermansia muciniphila                       | 1,7 x 10^10 CFU/g faeces  |        | > 5,0 x 10^9   | <div><div></div></div> | FE<br>NA) MGSEQ  |
| Faecalibacterium prausnitzii                  | 9,8 x 10^10 CFU/g faeces  |        | > 5,0 x 10^10  | <div><div></div></div> | FE<br>NA) MGSEQ  |
| Yeasts / Molds                                |                           |        |                |                        |                  |
| Candida albicans                              | < 1,0 x 10^3 CFU/g faeces |        | < 1,0 x 10^3   | <div><div></div></div> | FE<br>NA) KULTAZ |
| Candida species                               | < 1,0 x 10^3 CFU/g faeces |        | < 1,0 x 10^3   | <div><div></div></div> | FE<br>NA) KULTAZ |
| Geotrichum candidum                           | 4,0 x 10^5 CFU/g faeces   |        | < 1,0 x 10^3   | <div><div></div></div> | FE<br>NA) KULTAZ |
| Moulds                                        | negative                  |        | negative       | <div><div></div></div> | FE<br>NA) KULTAZ |
| Parasites                                     |                           |        |                |                        |                  |
| Pathobionts                                   |                           |        |                |                        |                  |
| Blastocystis hominis                          | positive                  |        | negative       | <div><div></div></div> | FE<br>A) MOLEK   |
| Dientamoeba fragilis                          | negative                  |        | negative       | <div><div></div></div> | FE<br>A) MOLEK   |
| Pathogenic intestinal protozoa                |                           |        |                |                        |                  |
| Giardia lamblia                               | negative                  |        | negative       | <div><div></div></div> | FE<br>A) MOLEK   |
| Entamoeba histolytica                         | negative                  |        | negative       | <div><div></div></div> | FE<br>A) MOLEK   |
| Cryptosporidium species                       | negative                  |        | negative       | <div><div></div></div> | FE<br>A) MOLEK   |
| Cyclospora cayetanensis                       | negative                  |        | negative       | <div><div></div></div> | FE<br>A) MOLEK   |
| Digestive Residues                            |                           |        |                |                        |                  |
| Quantitative determination of fat             | 6,80                      | g/100g | < 3,5          | <div><div></div></div> | FE<br>NA) PHOT   |
| Quantitative determination of nitrogen        | 0,80                      | g/100g | < 1,0          | <div><div></div></div> | FE<br>NA) PHOT   |
| Quantitative determination of sugar           | 2,60                      | g/100g | < 2,5          | <div><div></div></div> | FE<br>NA) PHOT   |
| Quantitative determination of water           | 72,00                     | g/100g | 75 - 85        | <div><div></div></div> | FE<br>NA) PHOT   |
| Special Request                               |                           |        |                |                        |                  |
| Calprotectin                                  | <17,90                    | mg/l   | < 50           | <div><div></div></div> | FE<br>A) ELISA   |
| Alpha1-Antitrypsin                            | <1,8                      | mg/dl  | < 27,5         | <div><div></div></div> | FE<br>A) ELISA   |
| Secretory IgA                                 | <167,0                    | µg/ml  | 510 - 2040     | <div><div></div></div> | FE<br>A) ELISA   |
| Zonulin                                       | 42,26                     | ng/ml  | < 55           | <div><div></div></div> | FE<br>A) ELISA   |
| Special gastro-enterological diagnostics      |                           |        |                |                        |                  |
| Gluten-Sensitive Enteropathy / Celiac Disease |                           |        |                |                        |                  |
| Anti-Gliadin antibodies in stool              | <25,00                    | U/l    | < 100          | <div><div></div></div> | FE<br>A) ELISA   |
| Anti-Transglutaminase antibodies in stool     | <50,00                    | U/l    | < 100          | <div><div></div></div> | FE<br>A) ELISA   |

## Overview - Results and Therapy Options

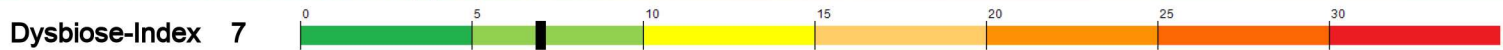

|                                   |   |                                                                                                                      |
|-----------------------------------|---|----------------------------------------------------------------------------------------------------------------------|
| pH                                | ↑ | milieu stabilizing probiotics *                                                                                      |
| Enterotype                        | 2 | check vitamin B2, B5, C and biotin supply                                                                            |
| Biodiversity                      | ● |                                                                                                                      |
| Ratio Firmicutes/Bacteroidetes    | ● |                                                                                                                      |
| Equol producing bacteria          | ● |                                                                                                                      |
| Butyrate producing bacteria       | ↓ | prebiotics on the basis of resistant starch* or scFOS/scGOS*                                                         |
| Mucus production                  | ● |                                                                                                                      |
| Mucosa integrity                  | ● |                                                                                                                      |
| Milieu stabilising bacteria       | ● |                                                                                                                      |
| Immunogenic bacteria              | ↑ | immunogenic effective probiotics*                                                                                    |
| Clostridia - total bacteria count | ● |                                                                                                                      |
| Clostridia cluster I              | ● |                                                                                                                      |
| Fusobacteria                      | ● |                                                                                                                      |
| Histamine producing bacteria      | ● |                                                                                                                      |
| H2S producing bacteria (SRB)      | ↑ | fat and protein reduction, milieu stabilizing probiotics, prebiotics on the basis of resistant starch or scFOS/scGOS |
| Potentially pathogenic bacteria   | ● |                                                                                                                      |
| Candida (facultive pathogenic)    | ● |                                                                                                                      |
