# Supplementary material
Source: MDPI journal article supplement (https://www.mdpi.com/2313-5786/2/1/1)
Supplement: s1 [file s1]

## External ID

|                 |                 |                 |
|-----------------|-----------------|-----------------|
| Name            | Date of Birth   | Order ID        |
| First Name      | Sex             | Order Date      |
| Sampling Date   | Validation Date | Findings Status |
| Sample Material | Validation on   | Findings Date   |

| Test                                                               | Result                               | Unit   | Standard Range                     |  | Previous Result  |
|--------------------------------------------------------------------|--------------------------------------|--------|------------------------------------|--|------------------|
| <b>Stool Diagnostics</b>                                           |                                      |        |                                    |  |                  |
| <b>Maldigestion, malabsorption, MIS</b>                            |                                      |        |                                    |  |                  |
| <b>Digestive Residues</b>                                          |                                      |        |                                    |  |                  |
| Quantitative determination of fat                                  | 5,00                                 | g/100g | < 3,5                              |  | FE<br>NA) PHOT   |
| Quantitative determination of nitrogen                             | 0,60                                 | g/100g | < 1,0                              |  | FE<br>NA) PHOT   |
| Quantitative determination of sugar                                | 2,90                                 | g/100g | < 2,5                              |  | FE<br>NA) PHOT   |
| Quantitative determination of water                                | 77,60                                | g/100g | 75 - 85                            |  | FE<br>NA) PHOT   |
| <b>Determination of Maldigestion</b>                               |                                      |        |                                    |  |                  |
| Pancreatic elastase                                                | 273,16                               | µg/g   | > 200                              |  | FE<br>A) ELISA   |
| Bile acids in stool                                                | negative                             |        | negative                           |  | FE<br>NA) PETKO  |
| <b>Detection of Malabsorption</b>                                  |                                      |        |                                    |  |                  |
| Calprotectin                                                       | <17,90                               | mg/l   | < 50                               |  | FE<br>A) ELISA   |
| Alpha1-Antitrypsin                                                 | 28,2                                 | mg/dl  | < 27,5                             |  | FE<br>A) ELISA   |
| <b>Special Request</b>                                             |                                      |        |                                    |  |                  |
| Secretory IgA                                                      | 758,3                                | µg/ml  | 510 - 2040                         |  | FE<br>A) ELISA   |
| <b>Quantitative Bacteriological and Mycological Stool Analysis</b> |                                      |        |                                    |  |                  |
| <b>Determination of Aerobic Bacteria</b>                           |                                      |        |                                    |  |                  |
| Escherichia coli                                                   | 6,0 x 10 <sup>7</sup> CFU/g faeces   |        | 10 <sup>6</sup> - 10 <sup>7</sup>  |  | FE<br>NA) KULTAZ |
| Escherichia coli Biovare                                           | < 1,0 x 10 <sup>4</sup> CFU/g faeces |        | < 1,0 x 10 <sup>4</sup>            |  | FE<br>NA) KULTAZ |
| Proteus species                                                    | < 1,0 x 10 <sup>4</sup> CFU/g faeces |        | < 1,0 x 10 <sup>4</sup>            |  | FE<br>NA) KULTAZ |
| Klebsiella species                                                 | < 1,0 x 10 <sup>4</sup> CFU/g faeces |        | < 1,0 x 10 <sup>4</sup>            |  | FE<br>NA) KULTAZ |
| Pseudomonas species                                                | < 1,0 x 10 <sup>4</sup> CFU/g faeces |        | < 1,0 x 10 <sup>4</sup>            |  | FE<br>NA) KULTAZ |
| Enterobacter species                                               | < 1,0 x 10 <sup>4</sup> CFU/g faeces |        | < 1,0 x 10 <sup>4</sup>            |  | FE<br>NA) KULTAZ |
| Serratia species                                                   | < 1,0 x 10 <sup>4</sup> CFU/g faeces |        | < 1,0 x 10 <sup>4</sup>            |  | FE<br>NA) KULTAZ |
| Hafnia species                                                     | < 1,0 x 10 <sup>4</sup> CFU/g faeces |        | < 1,0 x 10 <sup>4</sup>            |  | FE<br>NA) KULTAZ |
| Enterococcus species                                               | < 1,0 x 10 <sup>4</sup> CFU/g faeces |        | 10 <sup>6</sup> - 10 <sup>7</sup>  |  | FE<br>NA) KULTAZ |
| <b>Determination of Anaerobic Bacteria</b>                         |                                      |        |                                    |  |                  |
| Bifido bacteria species                                            | 4,0 x 10 <sup>7</sup> CFU/g faeces   |        | 10 <sup>9</sup> - 10 <sup>11</sup> |  | FE<br>NA) KULTAZ |
| Bacterioides species                                               | 1,0 x 10 <sup>9</sup> CFU/g faeces   |        | 10 <sup>9</sup> - 10 <sup>11</sup> |  | FE<br>NA) KULTAZ |
| Lactobacillus species                                              | < 1,0 x 10 <sup>4</sup> CFU/g faeces |        | 10 <sup>5</sup> - 10 <sup>7</sup>  |  | FE<br>NA) KULTAZ |
| Clostridium species                                                | < 1,0 x 10 <sup>5</sup> CFU/g faeces |        | < 1,0 x 10 <sup>5</sup>            |  | FE<br>NA) KULTAZ |
| <b>Mycological Stool Examination</b>                               |                                      |        |                                    |  |                  |
| Candida species                                                    | 2,0 x 10 <sup>3</sup> CFU/g faeces   |        | < 1,0 x 10 <sup>3</sup>            |  | FE<br>NA) KULTAZ |
| Candida albicans                                                   | < 1,0 x 10 <sup>3</sup> CFU/g faeces |        | < 1,0 x 10 <sup>3</sup>            |  | FE<br>NA) KULTAZ |
| Moulds                                                             | negative                             |        | negative                           |  | FE<br>NA) KULTAZ |

| Name                                          | Date of Birth |              | Order ID       |                        |
|-----------------------------------------------|---------------|--------------|----------------|------------------------|
| First Name                                    | Sex           |              | Order Date     |                        |
| Test                                          | Result        | Unit         | Standard Range | Previous Result        |
| Geotrichum candidum                           | 4,0 x 10^5    | CFU/g faeces | < 1,0 x 10^3   | <div><div></div></div> |
| Stool Properties                              |               |              |                |                        |
| Colour                                        | brown         |              |                |                        |
| Consistency                                   | mushy         |              |                |                        |
| pH                                            | 7,2           |              | 5,8 - 6,5      | <div><div></div></div> |
| Special gastro-enterological diagnostics      |               |              |                |                        |
| Gluten-Sensitive Enteropathy / Celiac Disease |               |              |                |                        |
| Anti-Gliadin antibodies in stool              | 55,81         | U/l          | < 100          | <div><div></div></div> |
| Anti-Transglutaminase antibodies in stool     | <50,00        | U/l          | < 100          | <div><div></div></div> |
